# Supplementary material for: Nanomolar determination of 4-nitrophenol based on a poly(methylene blue)-modified glassy carbon electrode
Source: Royal Society of Chemistry journal article supplement (doi:10.1039/c3an00941f), 2013-01-01
Supplement: c3an00941f.pdf [file c3an00941f.pdf]

## Nanomolar determination of 4-nitrophenol based on poly(methylene blue)-modified glassy carbon electrode

Krishnamoorthy Giribabu, Ranganathan Suresh, Ramadoss Manigandan,  
Settu Munusamy, Sivakumar Praveen Kumar, Selvamani Muthamizh and  
Vengidusamy Narayanan\*

Department of Inorganic Chemistry, University of Madras, Guindy Maraimalai  
Campus, Chennai-600025, India

\*Corresponding author: [yunnara@yahoo.co.in](mailto:yunnara@yahoo.co.in)

\*Telephone: +91-44-22202793, Fax: +91-44-22300488

### Supplementary Information

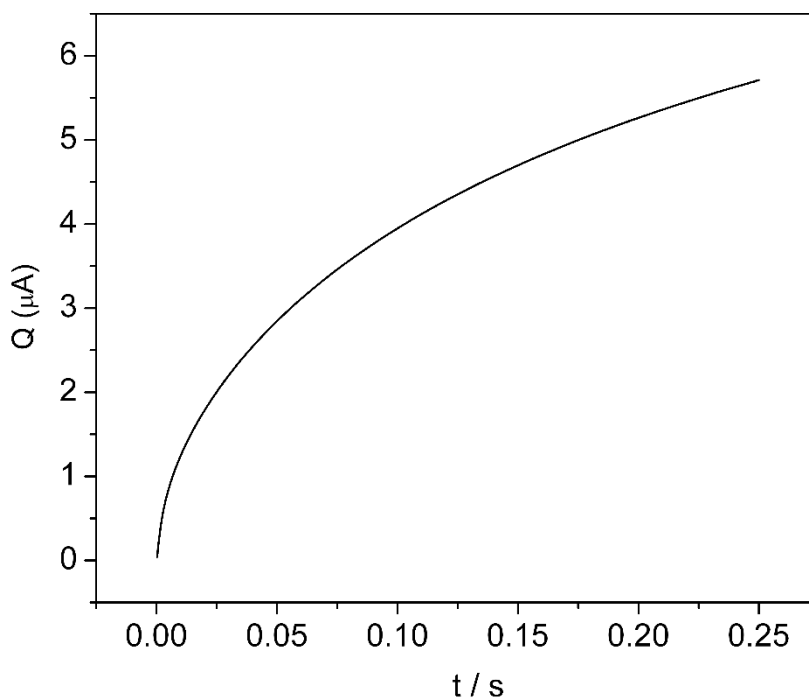

Fig S1. Plot of  $Q-t$  curve of 0.1 mM 4-NP at PMB/GCE after background subtraction.

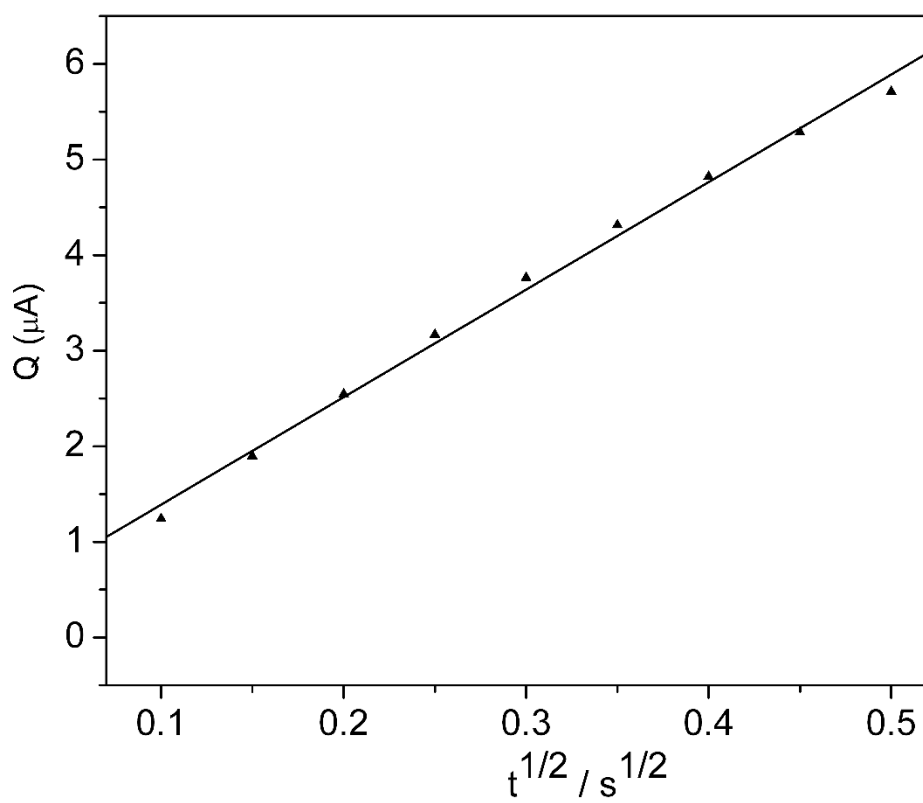

Fig S2. Plot of  $Q$  vs  $t^{1/2}$  curve.
